# Supplementary material for: Comparison of Empirical Models to Predict Viscosity of Secondary Vacuum Gas Oils
Source: MDPI journal article supplement (doi:10.3390/resources10080082), 2021-08-10
Supplement: s1 [file s1]

## *Supplementary material*

### **Comparison of empirical models to predict viscosity of secondary vacuum gas oils**

**Dicho S. Stratiev<sup>1</sup>, Svetoslav Nenov<sup>2</sup>, Ivelina K. Shishkova<sup>1</sup>, Rosen K. Dinkov<sup>1</sup>, Kamen Zlatanov<sup>2</sup>, Dobromir Yordanov<sup>3</sup>, Sotir Sotirov<sup>3</sup>, Evdokia Sotirova<sup>3</sup>, Vassia Atanassova<sup>4</sup>, Krassimir Atanassov<sup>3,4</sup>, Danail D. Stratiev<sup>4</sup>, Liliana Todorova-Yankova<sup>2</sup>,**

<sup>1</sup> LUKOIL Neftohim Burgas, 8104 Burgas, Bulgaria; Shishkova.Ivelina.K@neftochim.bg (I.K.S.); Dinkov.Rosen.K@neftochim.bg (R.K.D.); )

<sup>2</sup> University of Chemical Technology and Metallurgy, Kliment Ohridski 8, 1756 Sofia, Bulgaria; s.nenov@gmail.com (S.N.); kamenzlatanov99@gmail.com (K.Z.)

<sup>3</sup> University Prof. Dr. Assen Zlatarov, Professor Yakimov 1, 8010 Burgas, Bulgaria; dobromirj@abv.bg (D.Y.); ssotirov@btu.bg (S.S.); esotirova@btu.bg (E.S.); k.t.atanassov@gmail.com (K.A.); litoian@abv.bg

<sup>4</sup> Institute of Biophysics and Biomedical Engineering, Bulgarian Academy of Sciences, Bulgarian Academy of Sciences, Academic Georgi Bonchev 105, 1113 Sofia, Bulgaria; vassia.atanassova@gmail.com (V.A.)

\* Correspondence: stratiev.dicho@neftochim.bg

**Table S1.** 42 data points for measured at different temperatures VGO viscosities and predicted by the empirical model developed in this work and by the model of Aboul-Seoud and Moharam [15]

| Nr |            | Measured | Est. this work | Est. Aboul-Seoud and Moharam [15] | AD (this work) | AD (Aboul-Seoud and Moharam) | %AD (this work) | %AD(Aboul-Seoud and Moharam)) | SE (This work) | SE (Aboul-Seoud Aboul-Seoud and Moharam) |
|----|------------|----------|----------------|-----------------------------------|----------------|------------------------------|-----------------|-------------------------------|----------------|------------------------------------------|
| 1  | HAGO-5     | 29.6     | 22.1           | 24.3                              | 7.6            | 5.3                          | 25.6            | 17.9                          | 654            | 319                                      |
| 2  | HAGO-5     | 18.7     | 17.4           | 17.0                              | 1.4            | 1.7                          | 7.3             | 9.2                           | 53             | 84                                       |
| 3  | HAGO-5     | 15.0     | 14.0           | 12.4                              | 1.1            | 2.6                          | 7.0             | 17.4                          | 49             | 303                                      |
| 4  | HAGO-5     | 13.0     | 11.5           | 9.4                               | 1.5            | 3.6                          | 11.5            | 27.6                          | 132            | 761                                      |
| 5  | HAGO-5     | 11.3     | 9.6            | 7.3                               | 1.8            | 4.0                          | 15.6            | 35.5                          | 243            | 1260                                     |
| 6  | LVGO-5     | 30.8     | 22.5           | 26.8                              | 8.3            | 4.0                          | 27.0            | 13.0                          | 728            | 169                                      |
| 7  | LVGO-5     | 18.5     | 17.4           | 18.6                              | 1.1            | 0.0                          | 6.1             | 0.2                           | 37             | 0                                        |
| 8  | LVGO-5     | 14.8     | 13.8           | 13.4                              | 1.0            | 1.4                          | 7.0             | 9.3                           | 49             | 86                                       |
| 9  | LVGO-5     | 13.0     | 11.2           | 10.1                              | 1.8            | 2.9                          | 14.0            | 22.1                          | 195            | 490                                      |
| 10 | LVGO-5     | 11.7     | 9.2            | 7.8                               | 2.5            | 3.9                          | 21.5            | 33.2                          | 460            | 1103                                     |
| 11 | HVGO-5     | 118.6    | 127.1          | 116.0                             | 8.5            | 2.6                          | 7.2             | 2.2                           | 51             | 5                                        |
| 12 | HVGO-5     | 95.6     | 79.9           | 70.5                              | 15.7           | 25.1                         | 16.4            | 26.3                          | 270            | 690                                      |
| 13 | HVGO-5     | 57.5     | 53.0           | 45.5                              | 4.5            | 12.0                         | 7.8             | 20.8                          | 62             | 432                                      |
| 14 | HVGO-5     | 46.3     | 36.8           | 31.0                              | 9.5            | 15.3                         | 20.5            | 33.1                          | 422            | 1093                                     |
| 15 | HVGO-5     | 24.4     | 26.6           | 22.0                              | 2.2            | 2.4                          | 8.9             | 9.7                           | 79             | 94                                       |
| 16 | FCC SLO-12 | 109.3    | 119.3          | 132.3                             | 10.0           | 23.0                         | 9.2             | 21.0                          | 84             | 442                                      |
| 17 | FCC SLO-12 | 53.7     | 66.7           | 78.2                              | 12.9           | 24.5                         | 24.1            | 45.5                          | 581            | 2072                                     |
| 18 | FCC SLO-12 | 31.5     | 40.4           | 49.4                              | 8.9            | 17.9                         | 28.3            | 56.9                          | 799            | 3235                                     |
| 19 | FCC SLO-12 | 22.2     | 26.2           | 33.0                              | 3.9            | 10.8                         | 17.7            | 48.5                          | 313            | 2357                                     |
| 20 | FCC SLO-12 | 17.3     | 17.9           | 23.1                              | 0.6            | 5.9                          | 3.7             | 34.0                          | 14             | 1156                                     |
| 21 | VBGO-1     | 46.1     | 43.9           | 33.8                              | 2.2            | 12.3                         | 4.7             | 26.7                          | 22             | 713                                      |
| 22 | VBGO -2    | 39.5     | 40.1           | 31.1                              | 0.6            | 8.4                          | 1.6             | 21.1                          | 2              | 447                                      |
| 23 | VBGO-1     | 14.7     | 14.6           | 12.0                              | 0.1            | 2.7                          | 0.4             | 18.2                          | 0              | 332                                      |
| 24 | VBGO -2    | 13.5     | 13.7           | 11.3                              | 0.2            | 2.2                          | 1.3             | 16.3                          | 2              | 266                                      |
| 25 | FCC SLO-13 | 107.8    | 47.7           | 56.4                              | 60.1           | 51.4                         | 55.8            | 47.7                          | 3109           | 2273                                     |
| 26 | FCC SLO-13 | 46.3     | 31.6           | 35.9                              | 14.7           | 10.4                         | 31.8            | 22.5                          | 1009           | 508                                      |
| 27 | FCC SLO-13 | 29.8     | 22.0           | 24.2                              | 7.8            | 5.6                          | 26.1            | 18.9                          | 683            | 357                                      |
| 28 | FCC SLO-13 | 20.0     | 16.0           | 17.1                              | 4.0            | 2.9                          | 20.1            | 14.6                          | 404            | 214                                      |
| 29 | FCC SLO-13 | 14.5     | 12.0           | 12.6                              | 2.5            | 1.9                          | 17.2            | 13.4                          | 295            | 180                                      |

|                   |            |       |       |       |            |            |             |             |             |             |
|-------------------|------------|-------|-------|-------|------------|------------|-------------|-------------|-------------|-------------|
| 30                | FCC SLO-14 | 194.0 | 113.1 | 133.0 | 80.9       | 61.0       | 41.7        | 31.5        | 1737        | 989         |
| 31                | FCC SLO-14 | 85.1  | 65.2  | 77.3  | 19.9       | 7.8        | 23.4        | 9.2         | 547         | 84          |
| 32                | FCC SLO-14 | 44.8  | 40.5  | 48.3  | 4.3        | 3.4        | 9.6         | 7.7         | 93          | 59          |
| 33                | FCC SLO-14 | 25.6  | 26.8  | 32.0  | 1.1        | 6.4        | 4.4         | 24.8        | 20          | 615         |
| 34                | FCC SLO-14 | 16.2  | 18.6  | 22.3  | 2.4        | 6.1        | 15.0        | 37.5        | 224         | 1407        |
| 35                | HTVGO-1    | 28.8  | 29.3  | 18.3  | 0.5        | 10.5       | 1.8         | 36.5        | 3           | 1331        |
| 36                | HTVGO-1    | 19.6  | 20.2  | 13.1  | 0.6        | 6.4        | 2.9         | 32.9        | 9           | 1080        |
| 37                | HTVGO-1    | 14.1  | 14.5  | 9.8   | 0.4        | 4.3        | 3.0         | 30.3        | 9           | 917         |
| 38                | HTVGO-1    | 10.4  | 10.8  | 7.6   | 0.4        | 2.8        | 3.9         | 27.4        | 15          | 749         |
| 39                | HTVGO-2    | 25.6  | 27.7  | 16.8  | 2.1        | 8.8        | 8.3         | 34.3        | 68          | 1174        |
| 40                | HTVGO-2    | 17.7  | 19.1  | 12.2  | 1.5        | 5.5        | 8.3         | 31.1        | 68          | 970         |
| 41                | HTVGO-2    | 13.5  | 13.8  | 9.1   | 0.3        | 4.4        | 2.3         | 32.3        | 5           | 1043        |
| 42                | HTVGO-2    | 9.6   | 10.4  | 7.1   | 0.8        | 2.5        | 8.2         | 25.9        | 68          | 672         |
| Average deviation |            |       |       |       | <b>7.4</b> | <b>9.4</b> | <b>13.8</b> | <b>24.9</b> |             |             |
| Standard error    |            |       |       |       |            |            |             |             | <b>18.5</b> | <b>28.5</b> |
